# Supplementary material
Source: Springer Nature journal article supplement (https://www.springerprofessional.de/resource/supplementary/13638_2011_303_MOESM12_ESM.pdf/11898162)

BER in iteration termination

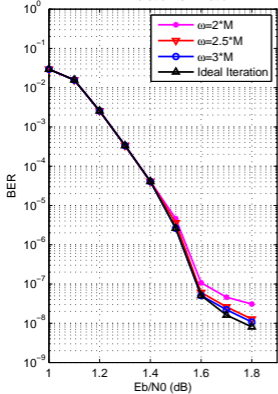

Average iterations in termination

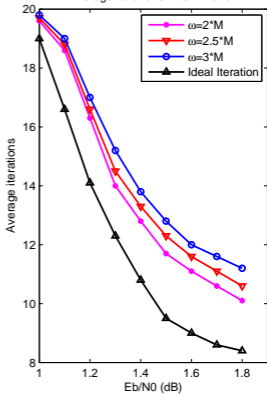

Supplement: MOESM12 [file 11898162]
